# Supplementary material for: Synthesis and Structure of a New Iodate Cs5[Sc2(IO3)9](IO3)2 with a Complex Framework Based on the Condensation of [Sc(IO3)6] Building Blocks
Source: MDPI journal article supplement (doi:10.3390/sym15091777), 2023-09-17
Supplement: s1 [file s1]

**Table S1.** Atomic coordinates and equivalent isotropic displacement parameters ( $\text{\AA}^2$ ) for  $\text{Cs}_5[\text{Sc}_2(\text{IO}_3)_9](\text{IO}_3)_2$ .

| Atom | $x/a$       | $y/b$       | $z/c$       | $U_{\text{eq}}^1, \text{\AA}^2$ |
|------|-------------|-------------|-------------|---------------------------------|
| I1   | 0.05126(2)  | 0.19953(4)  | 0.17631(2)  | 0.01039(8)                      |
| I2   | -0.25840(2) | 0.52037(4)  | 0.00814(3)  | 0.01322(9)                      |
| I3   | -0.45165(2) | 0.26200(4)  | -0.35185(3) | 0.01352(9)                      |
| I4   | -0.11550(2) | 0.26107(4)  | -0.00650(2) | 0.01286(9)                      |
| I5   | -0.29508(2) | 0.27463(4)  | -0.17225(3) | 0.01582(9)                      |
| I6   | -0.36355(2) | 0.79144(4)  | 0.00693(2)  | 0.01309(9)                      |
| I7   | 0.15803(2)  | 0.47752(4)  | 0.16145(3)  | 0.01390(9)                      |
| I8   | 0.08250(2)  | 0.44504(4)  | 0.34586(2)  | 0.01182(9)                      |
| I9   | -0.33246(2) | 0.53679(4)  | 0.19024(3)  | 0.01494(9)                      |
| I10  | -0.43912(2) | 0.01205(4)  | -0.17383(3) | 0.01477(9)                      |
| I11  | -0.28091(3) | 0.11527(5)  | 0.05620(3)  | 0.03087(13)                     |
| Cs1  | 0.04634(2)  | 0.09965(5)  | 0.40967(3)  | 0.02713(11)                     |
| Cs2  | 0.19836(2)  | 0.11145(5)  | 0.08082(3)  | 0.02584(11)                     |
| Cs3  | -0.45916(3) | 0.37357(6)  | -0.07989(3) | 0.03748(13)                     |
| Cs4  | -0.36793(2) | 0.61728(5)  | -0.25495(4) | 0.03553(14)                     |
| Cs5  | 0.12455(3)  | -0.15773(6) | 0.25676(4)  | 0.04434(15)                     |
| Sc1  | 0.5000      | 0.5000      | 0.5000      | 0.0108(3)                       |
| Sc2  | 0.0000      | 0.0000      | 0.0000      | 0.0102(3)                       |
| Sc3  | 0.21296(5)  | 0.2487(1)   | 0.32488(7)  | 0.0102(2)                       |
| O1   | -0.29124(2) | 0.8352(4)   | 0.0904(3)   | 0.0186(10)                      |
| O2   | -0.2797(2)  | 0.6702(4)   | 0.2251(3)   | 0.0170(10)                      |
| O3   | 0.1509(2)   | 0.3352(5)   | 0.3782(3)   | 0.0204(11)                      |
| O4   | -0.3761(2)  | 0.6392(4)   | 0.0372(3)   | 0.0217(11)                      |
| O5   | 0.1340(2)   | 0.1635(4)   | 0.2405(3)   | 0.0169(10)                      |
| O6   | 0.0115(2)   | 0.0886(5)   | 0.2204(3)   | 0.0209(11)                      |
| O7   | 0.2139(2)   | 0.3907(4)   | 0.2447(3)   | 0.0220(11)                      |
| O8   | -0.5409(2)  | 0.2586(5)   | -0.3811(3)  | 0.0264(12)                      |
| O9   | -0.4208(2)  | 0.8758(5)   | 0.0436(3)   | 0.0250(12)                      |
| O10  | 0.0259(2)   | 0.3402(5)   | 0.2800(3)   | 0.0214(11)                      |
| O11  | -0.4324(3)  | 0.1645(5)   | -0.2099(3)  | 0.0304(13)                      |
| O12  | -0.4021(2)  | 0.5993(5)   | 0.2129(3)   | 0.0282(12)                      |
| O13  | -0.0789(2)  | 0.3799(5)   | -0.0495(3)  | 0.0243(12)                      |
| O14  | -0.2263(2)  | 0.5819(5)   | 0.1108(3)   | 0.0206(10)                      |
| O15  | 0.0551(2)   | 0.4202(5)   | 0.4326(3)   | 0.0255(12)                      |
| O16  | 0.0565(2)   | 0.1062(4)   | 0.0929(3)   | 0.0195(11)                      |
| O17  | -0.0667(2)  | 0.2739(6)   | 0.0964(3)   | 0.0316(14)                      |
| O18  | -0.3218(2)  | 0.3177(5)   | -0.2756(3)  | 0.0297(13)                      |
| O19  | -0.4417(2)  | 0.3638(5)   | -0.4299(3)  | 0.0226(11)                      |
| O20  | -0.1807(2)  | 0.4720(5)   | 0.0014(3)   | 0.0263(12)                      |

|     |            |            |            |            |
|-----|------------|------------|------------|------------|
| O21 | -0.2716(2) | 0.6632(5)  | -0.0468(3) | 0.0259(12) |
| O22 | -0.3038(3) | 0.4242(5)  | -0.1307(3) | 0.0316(13) |
| O23 | 0.1120(2)  | 0.3520(5)  | 0.1041(3)  | 0.0271(12) |
| O24 | -0.5163(2) | -0.0382(5) | -0.2412(3) | 0.0265(12) |
| O25 | -0.4336(2) | 0.1193(5)  | -0.3909(3) | 0.0277(12) |
| O26 | -0.2072(2) | 0.2682(5)  | -0.1544(3) | 0.0282(13) |
| O27 | -0.4688(3) | 0.0594(5)  | -0.0928(3) | 0.0294(12) |
| O28 | -0.0771(2) | 0.1303(5)  | -0.0384(3) | 0.0306(13) |
| O29 | 0.1045(3)  | 0.5314(5)  | 0.2147(3)  | 0.0322(14) |
| O30 | -0.2955(3) | 0.4457(6)  | 0.2771(4)  | 0.054(2)   |
| O31 | -0.3160(3) | 0.0357(7)  | -0.0373(4) | 0.056(2)   |
| O32 | -0.1952(3) | 0.1022(7)  | 0.0673(5)  | 0.058(2)   |
| O33 | -0.2958(4) | 0.2714(7)  | 0.0266(6)  | 0.097(4)   |

${}^1U(eq)$  is defined as one third of the trace of the orthogonalized  $U_{ij}$  tensor.

**Table S2.** Selected interatomic distances for  $Cs_5[Sc_2(IO_3)_9](IO_3)_2$

| Bond        |         | Distance, Å | Bond        |         | Distance, Å | Bond        |     | Distance, Å |
|-------------|---------|-------------|-------------|---------|-------------|-------------|-----|-------------|
| I1          | O6      | 1.787(5)    | I2          | O20     | 1.784(4)    | I3          | O25 | 1.786(5)    |
| I1          | O16     | 1.815(4)    | I2          | O21     | 1.803(5)    | I3          | O8  | 1.817(4)    |
| I1          | O5      | 1.818(4)    | I2          | O14     | 1.842(5)    | I3          | O19 | 1.826(5)    |
| Av. I1 – O  |         | 1.807       | Av. I2 – O  |         | 1.810       | Av. I3 – O  |     | 1.810       |
| I4          | O17     | 1.787(5)    | I5          | O18     | 1.786(5)    | I6          | O4  | 1.783(5)    |
| I4          | O13     | 1.796(5)    | I5          | O26     | 1.808(4)    | I6          | O9  | 1.804(4)    |
| I4          | O28     | 1.817(5)    | I5          | O22     | 1.815(5)    | I6          | O1  | 1.828(4)    |
| Av. I4 – O  |         | 1.800       | Av. I5 – O  |         | 1.803       | Av. I6 – O  |     | 1.805       |
| I7          | O29     | 1.790(5)    | I8          | O10     | 1.795(5)    | I9          | O30 | 1.783(6)    |
| I7          | O23     | 1.795(5)    | I8          | O15     | 1.817(5)    | I9          | O12 | 1.794(5)    |
| I7          | O7      | 1.832(4)    | I8          | O3      | 1.836(4)    | I9          | O2  | 1.822(4)    |
| Av. I7 – O  |         | 1.806       | Av. I8 – O  |         | 1.816       | Av. I9 – O  |     | 1.800       |
| I10         | O24     | 1.788(5)    | I11         | O33     | 1.773(7)    |             |     |             |
| I10         | O11     | 1.796(5)    | I11         | O32     | 1.789(6)    |             |     |             |
| I10         | O27     | 1.808(5)    | I11         | O31     | 1.799(7)    |             |     |             |
| Av. I10 – O |         | 1.797       | Av. I11 – O |         | 1.787       |             |     |             |
| Sc1         | O27(x2) | 2.050(5)    | Sc2         | O16(x2) | 2.053(4)    | Sc3         | O3  | 2.075(4)    |
| Sc1         | O19(x2) | 2.074(5)    | Sc2         | O15(x2) | 2.104(5)    | Sc3         | O2  | 2.080(4)    |
| Sc1         | O9(x2)  | 2.113(5)    | Sc2         | O28(x2) | 2.117(5)    | Sc3         | O5  | 2.082(4)    |
|             |         |             |             |         |             | Sc3         | O1  | 2.083(4)    |
|             |         |             |             |         |             | Sc3         | O7  | 2.095(5)    |
|             |         |             |             |         |             | Sc3         | O14 | 2.107(5)    |
| Av. Sc1 – O |         | 2.079       | Av. Sc2 – O |         | 2.091       | Av. Sc3 – O |     | 2.087       |
| Cs1         | O13     | 2.992(4)    | Cs2         | O21     | 3.066(5)    | Cs3         | O12 | 3.163(5)    |
| Cs1         | O20     | 3.132(5)    | Cs2         | O16     | 3.110(4)    | Cs3         | O24 | 3.169(5)    |
| Cs1         | O6      | 3.173(5)    | Cs2         | O30     | 3.245(6)    | Cs3         | O25 | 3.193(5)    |
| Cs1         | O23     | 3.302(5)    | Cs2         | O31     | 3.269(6)    | Cs3         | O11 | 3.395(6)    |

|             |     |          |             |     |          |             |     |          |
|-------------|-----|----------|-------------|-----|----------|-------------|-----|----------|
| Cs1         | O13 | 3.339(5) | Cs2         | O23 | 3.301(6) | Cs3         | O27 | 3.424(6) |
| Cs1         | O29 | 3.362(5) | Cs2         | O15 | 3.359(5) | Cs3         | O25 | 3.453(5) |
| Cs1         | O10 | 3.404(5) | Cs2         | O2  | 3.365(5) |             |     |          |
| Cs1         | O15 | 3.505(6) | Cs2         | O3  | 3.431(5) |             |     |          |
|             |     |          | Cs2         | O32 | 3.473(8) |             |     |          |
| Av. Cs1 – O |     | 3.276    | Av. Cs2 – O |     | 3.291    | Av. Cs3 – O |     | 3.300    |
| Cs4         | O24 | 2.982(5) | Cs5         | O10 | 3.078(4) |             |     |          |
| Cs4         | O22 | 3.028(5) | Cs5         | O26 | 3.132(5) |             |     |          |
| Cs4         | O2  | 3.073(5) | Cs5         | O17 | 3.279(5) |             |     |          |
| Cs4         | O12 | 3.174(5) | Cs5         | O29 | 3.456(6) |             |     |          |
| Cs4         | O7  | 3.245(5) | Cs5         | O5  | 3.514(5) |             |     |          |
| Cs4         | O9  | 3.361(5) | Cs5         | O6  | 3.529(5) |             |     |          |
| Cs4         | O18 | 3.454(6) |             |     |          |             |     |          |
| Av. Cs4 – O |     | 3.188    | Av. Cs5 – O |     | 3.331    |             |     |          |
